# Supplementary material for: Evaluation of Autof MS2600 and MBT Smart MALDI-TOF MS Systems for Routine Identification of Clinical Bacteria and Yeasts
Source: MDPI journal article supplement (doi:10.3390/microorganisms12020382), 2024-02-13
Supplement: s1 [file s1]

| MS2600 ID                   | SCORE Autobio | MBT smart                   | Score Bruker | Score UCSC Library | Sequence |
|-----------------------------|---------------|-----------------------------|--------------|--------------------|----------|
| <i>Candida albicans</i>     | 9.54          | <i>Candida albicans</i>     | no reliable  | 2.11               |          |
| <i>Candida albicans</i>     | 9.56          | <i>Candida albicans</i>     | no reliable  | 2.01               |          |
| <i>Candida albicans</i>     | 9.43          | <i>Candida albicans</i>     | no reliable  | 2.14               |          |
| <i>Candida albicans</i>     | 9.69          | <i>Candida albicans</i>     | 1.96         | 2.0                |          |
| <i>Candida albicans</i>     | 9.46          | <i>Candida albicans</i>     | 1.88         | 2.12               |          |
| <i>Candida albicans</i>     | 9.66          | <i>Candida albicans</i>     | no reliable  | 2.23               |          |
| <i>Candida albicans</i>     | 9.52          | <i>Candida albicans</i>     | 2.15         | 2.2                |          |
| <i>Candida albicans</i>     | 9.64          | <i>Candida albicans</i>     | 2.3          | 2.2                |          |
| <i>Candida albicans</i>     | 9.61          | <i>Candida albicans</i>     | 2.08         | 2.01               |          |
| <i>Candida albicans</i>     | 9.67          | <i>Candida albicans</i>     | 2.29         | 1.94               |          |
| <i>Candida albicans</i>     | 9.64          | <i>Candida albicans</i>     | 2.09         | 1.86               |          |
| <i>Candida albicans</i>     | 9.34          | <i>Candida albicans</i>     | 2.19         | 2.5                |          |
| <i>Candida albicans</i>     | 9.61          | <i>Candida albicans</i>     | 2.21         | 2.12               |          |
| <i>Candida albicans</i>     | 9.14          | <i>Candida albicans</i>     | 2.07         | 1.97               |          |
| <i>Candida albicans</i>     | 9.45          | <i>Candida albicans</i>     | 2.12         | 2.07               |          |
| <i>Candida albicans</i>     | 9.09          | <i>Candida albicans</i>     | no reliable  | 2.12               |          |
| <i>Candida albicans</i>     | 9.3           | <i>Candida albicans</i>     | 2.0          | 2.26               |          |
| <i>Candida albicans</i>     | 9.22          | <i>Candida albicans</i>     | 1.78         | 2.3                |          |
| <i>Candida albicans</i>     | 9.55          | <i>Candida albicans</i>     | no reliable  | 2.38               |          |
| <i>Candida albicans</i>     | 9.65          | <i>Candida albicans</i>     | 2.0          | 2.6                |          |
| <i>Candida albicans</i>     | 9.51          | <i>Candida albicans</i>     | 2.11         | 1.96               |          |
| <i>Candida albicans</i>     | 9.15          | <i>Candida albicans</i>     | 2.03         | 2.14               |          |
| <i>Candida albicans</i>     | 9.7           | <i>Candida albicans</i>     | 2.06         | 2.24               |          |
| <i>Candida albicans</i>     | 9.6           | <i>Candida albicans</i>     | 1.70         | 2.25               |          |
| <i>Candida albicans</i>     | 9.7           | <i>Candida albicans</i>     | no reliable  | 2.09               |          |
| <i>Candida albicans</i>     | 9.52          | <i>Candida albicans</i>     | no reliable  | 2.09               |          |
| <i>Candida albicans</i>     | 9.72          | <i>Candida albicans</i>     | 2.15         | 2.17               |          |
| <i>Candida albicans</i>     | 9.72          | <i>Candida albicans</i>     | no reliable  | 2.14               |          |
| <i>Candida albicans</i>     | 9.71          | <i>Candida albicans</i>     | 1.87         | 2.11               |          |
| <i>Candida albicans</i>     | 9.46          | <i>Candida albicans</i>     | 2.21         | 2.36               |          |
| <i>Candida albicans</i>     | 9.62          | <i>Candida albicans</i>     | 1.91         | 2.17               |          |
| <i>Candida albicans</i>     | 9.52          | <i>Candida albicans</i>     | 2.04         | 2.21               |          |
| <i>Candida albicans</i>     | 9.56          | <i>Candida albicans</i>     | 2.07         | 2.13               |          |
| <i>Candida albicans</i>     | 9.16          | <i>Candida albicans</i>     | no reliable  | 2.21               |          |
| <i>Candida albicans</i>     | 9.57          | <i>Candida albicans</i>     | 2.14         | 2.31               |          |
| <i>Candida auris</i>        | 9.33          | <i>Candida auris</i>        | no reliable  | 2.05               |          |
| <i>Candida auris</i>        | 9.07          | <i>Candida auris</i>        | no reliable  | 2.05               |          |
| <i>Candida auris</i>        | 9.47          | <i>Candida auris</i>        | no reliable  | 2.01               |          |
| <i>Candida auris</i>        | 9.19          | <i>Candida auris</i>        | no reliable  | 2.06               |          |
| <i>Candida dubliniensis</i> | 9.08          | <i>Candida dubliniensis</i> | 2.13         | 1.95               |          |
| <i>Candida dubliniensis</i> | 9.09          | <i>Candida dubliniensis</i> | 2.28         | 2.02               |          |
| <i>Candida glabrata</i>     | 9.21          | <i>Candida glabrata</i>     | 2.25         | 2.45               |          |
| <i>Candida glabrata</i>     | 9.21          | <i>Candida glabrata</i>     | 2.23         | 2.38               |          |
| <i>Candida glabrata</i>     | 9.15          | <i>Candida glabrata</i>     | 2.11         | 2.04               |          |

|                                                          |      |                                                          |             |             |                           |
|----------------------------------------------------------|------|----------------------------------------------------------|-------------|-------------|---------------------------|
| <i>Candida glabrata</i>                                  | 9.25 | <i>Candida glabrata</i>                                  | 2.26        | 2.36        |                           |
| <i>Candida glabrata</i>                                  | 9.01 | <i>Candida glabrata</i>                                  | 2.45        | 2.52        |                           |
| <i>Candida glabrata</i>                                  | 9.03 | <i>Candida glabrata</i>                                  | 2.04        | 2.13        |                           |
| <i>Candida glabrata</i>                                  | 9.21 | <i>Candida glabrata</i>                                  | 2.08        | 1.98        |                           |
| <i>Candida glabrata</i>                                  | 9.21 | <i>Candida glabrata</i>                                  | 2.01        | 2.02        |                           |
| <i>Candida glabrata</i>                                  | 9.08 | <i>Candida glabrata</i>                                  | 2.18        | 2.04        |                           |
| <i>Candida glabrata</i>                                  | 9.33 | <i>Candida glabrata</i>                                  | 2.2         | 2.27        |                           |
| <i>Candida haemulonii</i>                                | 9.22 | <i>Candida haemulonii</i>                                | no reliable | no reliable | <i>Candida haemulonii</i> |
| <i>Candida haemulonii</i>                                | 9.1  | <i>Candida haemulonii</i>                                | no reliable | no reliable | <i>Candida haemulonii</i> |
| <i>Candida kefyr</i> ( <i>Kluyveromyces marxianus</i> )  | 9.14 | <i>Candida kefyr</i>                                     | 1.80        | 2.01        |                           |
| <i>Candida krusei</i> ( <i>Issatchenkia orientalis</i> ) | 9.05 | <i>Candida krusei</i> ( <i>Issatchenkia orientalis</i> ) | no reliable | 2.04        |                           |
| <i>Candida krusei</i> ( <i>Issatchenkia orientalis</i> ) | 9.04 | <i>Candida krusei</i> ( <i>Issatchenkia orientalis</i> ) | no reliable | 2.01        |                           |
| <i>Candida krusei</i> ( <i>Issatchenkia orientalis</i> ) | 9.06 | <i>Candida krusei</i> ( <i>Issatchenkia orientalis</i> ) | no reliable | 2.08        |                           |
| <i>Candida krusei</i> ( <i>Issatchenkia orientalis</i> ) | 9.17 | <i>Candida krusei</i> ( <i>Issatchenkia orientalis</i> ) | 1.88        | 2.11        |                           |
| <i>Candida krusei</i> ( <i>Issatchenkia orientalis</i> ) | 9.08 | <i>Candida krusei</i> ( <i>Issatchenkia orientalis</i> ) | no reliable | 2.01        |                           |
| <i>Candida metapsilosis</i>                              | 9.23 | <i>Candida metapsilosis</i>                              | no reliable | 2.0         |                           |
| <i>Candida metapsilosis</i>                              | 9.23 | <i>Candida metapsilosis</i>                              | no reliable | 2.29        |                           |
| <i>Candida metapsilosis</i>                              | 9.01 | <i>Candida metapsilosis</i>                              | no reliable | 2.24        |                           |
| <i>Candida metapsilosis</i>                              | 9.04 | <i>Candida metapsilosis</i>                              | 1.97        | 2.25        |                           |
| <i>Candida metapsilosis</i>                              | 9.14 | <i>Candida metapsilosis</i>                              | no reliable | 2.19        |                           |
| <i>Candida metapsilosis</i>                              | 9.04 | <i>Candida metapsilosis</i>                              | no reliable | 2.30        |                           |
| <i>Candida nivariensis</i>                               | 9.16 | <i>Candida nivariensis</i>                               | no reliable | 2.06        |                           |
| <i>Candida nivariensis</i>                               | 9.34 | <i>Candida nivariensis</i>                               | no reliable | 2.02        |                           |
| <i>Candida norvegensis</i> ( <i>Pichia norvegensis</i> ) | 9.33 | <i>Candida norvegensis</i>                               | 1.96        | 2.08        |                           |
| <i>Candida norvegensis</i> ( <i>Pichia norvegensis</i> ) | 9.12 | <i>Candida norvegensis</i>                               | 2.11        | 1.82        |                           |
| <i>Candida orthopsilosis</i>                             | 9.25 | <i>Candida orthopsilosis</i>                             | no reliable | 2.22        |                           |
| <i>Candida ortopsilosis</i>                              | 9.22 | <i>Candida orthopsilosis</i>                             | no reliable | 2.04        |                           |
| <i>Candida ortopsilosis</i>                              | 9.24 | <i>Candida orthopsilosis</i>                             | no reliable | 2.02        |                           |
| <i>Candida ortopsilosis</i>                              | 9.18 | <i>Candida orthopsilosis</i>                             | no reliable | 2.22        |                           |
| <i>Candida ortopsilosis</i>                              | 9.05 | <i>Candida orthopsilosis</i>                             | no reliable | 2.26        |                           |
| <i>Candida parapsilosis</i>                              | 9.18 | <i>Candida parapsilosis</i>                              | 1.85        | 2.08        |                           |
| <i>Candida parapsilosis</i>                              | 9.04 | <i>Candida parapsilosis</i>                              | 1.75        | 2.11        |                           |
| <i>Candida parapsilosis</i>                              | 9.49 | <i>Candida parapsilosis</i>                              | 2.01        | 2.3         |                           |
| <i>Candida parapsilosis</i>                              | 9.04 | <i>Candida parapsilosis</i>                              | 1.78        | 2.04        |                           |
| <i>Candida tropicalis</i>                                | 9.1  | <i>Candida tropicalis</i>                                | 2.1         | 1.93        |                           |
| <i>Candida tropicalis</i>                                | 9.45 | <i>Candida tropicalis</i>                                | 2.02        | 1.92        |                           |
| <i>Candida tropicalis</i>                                | 9.32 | <i>Candida tropicalis</i>                                | 2.0         | 2.3         |                           |
| <i>Candida tropicalis</i>                                | 9.15 | <i>Candida tropicalis</i>                                | 2.22        | 1.70        |                           |
| <i>Candida tropicalis</i>                                | 9.5  | <i>Candida tropicalis</i>                                | 2.12        | 2.04        |                           |
| <i>Candida tropicalis</i>                                | 9.37 | <i>Candida tropicalis</i>                                | no reliable | 2.02        |                           |
| <i>Candida tropicalis</i>                                | 9.32 | <i>Candida tropicalis</i>                                | 2.01        | 1.91        |                           |
| <i>Cryptococcus neoformans</i>                           | 9.06 | <i>Cryptococcus neoformans</i>                           | 1.86        | 2.05        |                           |
| <i>Cryptococcus neoformans</i>                           | 9.02 | <i>Cryptococcus neoformans</i>                           | 1.75        | 2.16        |                           |
| <i>Cryptococcus neoformans</i>                           | 9.10 | <i>Cryptococcus neoformans</i>                           | 1.86        | 2.23        |                           |
| <i>Cryptococcus neoformans</i>                           | 9.12 | <i>Cryptococcus neoformans</i>                           | 1.9         | 2.05        |                           |

|                                  |             |                                  |             |             |                                  |
|----------------------------------|-------------|----------------------------------|-------------|-------------|----------------------------------|
| <i>Cryptococcus neoformans</i>   | 7.89        | no reliable                      | no reliable | -           | <i>Cryptococcus neoformans</i>   |
| <i>Rhodotorula mucillaginosa</i> | 9.21        | <i>Rhodotorula mucillaginosa</i> | 1.86        | 2.06        | <i>Rhodotorula mucillaginosa</i> |
| <i>Rhodotorula mucillaginosa</i> | 9.12        | <i>Rhodotorula mucillaginosa</i> | 1.97        | 2.23        | <i>Rhodotorula mucillaginosa</i> |
| <i>Rhodotorula mucillaginosa</i> | 9.57        | <i>Rhodotorula mucillaginosa</i> | 1.94        | 2.19        |                                  |
| <i>Rhodotorula mucillaginosa</i> | 9.3         | <i>Rhodotorula mucillaginosa</i> | 1.71        | 2.17        |                                  |
| <i>Rhodotorula mucillaginosa</i> | 9.37        | <i>Rhodotorula mucillaginosa</i> | no reliable | 2.14        |                                  |
| <i>Saccharomyces cerevisiae</i>  | 9.02        | <i>Candida robusta</i>           | no reliable | 2.05        |                                  |
| <i>Saccharomyces cerevisiae</i>  | 9.08        | <i>Saccharomyces cerevisiae</i>  | no reliable | 2.01        |                                  |
| <i>Saccharomyces cerevisiae</i>  | 9.09        | <i>Candida robusta</i>           | no reliable | 2.04        |                                  |
| <i>Saprochaete clavata</i>       | no reliable | <i>Saprochaete clavata</i>       | no reliable | no reliable | <i>Saprochaete clavata</i>       |
| <i>Trichosporon asahii</i>       | 9.30        | <i>Trichosporon asahii</i>       | 1.79        | 2.09        |                                  |
| <i>Trichosporon asahii</i>       | 9.18        | <i>Trichosporon asahii</i>       | 1.87        | 2.14        |                                  |
