# Supplementary material for: Evaluation of Autof MS2600 and MBT Smart MALDI-TOF MS Systems for Routine Identification of Clinical Bacteria and Yeasts
Source: MDPI journal article supplement (doi:10.3390/microorganisms12020382), 2024-02-13
Supplement: s1 [file s1]

| MS2600 ID                           | Score Autobio | MBT smart ID                        | Score Bruker | Sequence ID                    |
|-------------------------------------|---------------|-------------------------------------|--------------|--------------------------------|
| <i>Achromobacter xylosoxidans</i>   | 9.54          | <i>Achromobacter xylosoxidans</i>   | 2.24         | <i>Acinetobacter baumannii</i> |
| <i>Achromobacter xylosoxidans</i>   | 9.56          | <i>Achromobacter xylosoxidans</i>   | 2.07         |                                |
| <i>Acinetobacter baumannii</i>      | 9.43          | <i>Acinetobacter baumannii</i>      | 2.31         |                                |
| <i>Acinetobacter baumannii</i>      | 9.69          | <i>Acinetobacter baumannii</i>      | 2.33         |                                |
| <i>Acinetobacter baumannii</i>      | 9.46          | <i>Acinetobacter baumannii</i>      | 2.26         |                                |
| <i>Acinetobacter baumannii</i>      | 9.66          | <i>Acinetobacter baumannii</i>      | 2.29         |                                |
| <i>Acinetobacter baumannii</i>      | 9.52          | <i>Acinetobacter baumannii</i>      | 2.15         |                                |
| <i>Acinetobacter baumannii</i>      | 9.64          | <i>Acinetobacter baumannii</i>      | 2.36         |                                |
| <i>Acinetobacter baumannii</i>      | 9.61          | <i>Acinetobacter baumannii</i>      | 2.41         |                                |
| <i>Acinetobacter baumannii</i>      | 9.67          | <i>Acinetobacter baumannii</i>      | 2.41         |                                |
| <i>Acinetobacter baumannii</i>      | 9.64          | <i>Acinetobacter baumannii</i>      | 2.36         |                                |
| <i>Acinetobacter baumannii</i>      | 9.34          | <i>Acinetobacter nosocomialis</i>   | 2.23         |                                |
| <i>Acinetobacter baumannii</i>      | 9.61          | <i>Acinetobacter baumannii</i>      | 2.31         |                                |
| <i>Actinomyces europaeus</i>        | 9.14          | <i>Actinomyces europaeus</i>        | 2.0          |                                |
| <i>Actinomyces neuui</i>            | 9.45          | <i>Winkia neuui</i>                 | 2.29         |                                |
| <i>Actinomyces turicensis</i>       | 9.09          | <i>Schaalia turicensis</i>          | 2.09         |                                |
| <i>Actinomyces turicensis</i>       | 9.3           | <i>Schaalia turicensis</i>          | 2.06         |                                |
| <i>Aeromonas hydrophila</i>         | 9.22          | <i>Aeromonas hydrophila</i>         | 2.17         |                                |
| <i>Bacteroides faecis</i>           | 9.55          | <i>Bacteroides faecis</i>           | 2.3          |                                |
| <i>Bacteroides faecis</i>           | 9.65          | <i>Bacteroides faecis</i>           | 2.5          |                                |
| <i>Bacteroides fluxus</i>           | 9.51          | <i>Bacteroides fluxus</i>           | 2.38         |                                |
| <i>Bacteroides fragilis</i>         | 9.15          | <i>Bacteroides fragilis</i>         | 2.15         |                                |
| <i>Bacteroides fragilis</i>         | 9.7           | <i>Bacteroides fragilis</i>         | 2.47         |                                |
| <i>Bacteroides fragilis</i>         | 9.6           | <i>Bacteroides fragilis</i>         | 2.42         |                                |
| <i>Bacteroides fragilis</i>         | 9.7           | <i>Bacteroides fragilis</i>         | 2.46         |                                |
| <i>Bacteroides fragilis</i>         | 9.52          | <i>Bacteroides fragilis</i>         | 2.29         |                                |
| <i>Bacteroides fragilis</i>         | 9.72          | <i>Bacteroides fragilis</i>         | 2.52         |                                |
| <i>Bacteroides fragilis</i>         | 9.72          | <i>Bacteroides fragilis</i>         | 2.5          |                                |
| <i>Bacteroides fragilis</i>         | 9.71          | <i>Bacteroides fragilis</i>         | 2.4          |                                |
| <i>Bacteroides ovatus</i>           | 9.46          | <i>Bacteroides ovatus</i>           | 2.14         |                                |
| <i>Bacteroides ovatus</i>           | 9.62          | <i>Bacteroides ovatus</i>           | 2.05         |                                |
| <i>Bacteroides thetaiotaomicron</i> | 9.52          | <i>Bacteroides thetaiotaomicron</i> | 2.26         |                                |

|                                         |      |                                     |      |                                |
|-----------------------------------------|------|-------------------------------------|------|--------------------------------|
| <i>Bacteroides thetaiotaomicron</i>     | 9.56 | <i>Bacteroides thetaiotaomicron</i> | 2.12 |                                |
| <i>Bifidobacterium bifidum</i>          | 9.16 | <i>Bifidobacterium bifidum</i>      | 2.0  |                                |
| <i>Burkholderia gladioli</i>            | 9.57 | <i>Burkholderia gladioli</i>        | 2.36 |                                |
| <i>Citrobacter freundii</i>             | 9.16 | <i>Citrobacter freundii</i>         | 2.38 |                                |
| <i>Citrobacter freundii</i>             | 9.0  | <i>Citrobacter braakii</i>          | 2.23 | <i>Citrobacter freundii</i>    |
| <i>Citrobacter koseri</i>               | 9.41 | <i>Citrobacter koseri</i>           | 2.44 |                                |
| <i>Clostridium hathewayi</i>            | 9.53 | <i>Hungatella hathewayi</i>         | 2.22 |                                |
| <i>Clostridium perfringens</i>          | 9.71 | <i>Clostridium perfringens</i>      | 2.56 |                                |
| <i>Clostridium ramosum</i>              | 9.56 | <i>Clostridium ramosum</i>          | 2.4  |                                |
| <i>Clostridium septicum</i>             | 9.52 | <i>Clostridium septicum</i>         | 2.16 |                                |
| <i>Corynebacterium striatum</i>         | 9.26 | <i>Corynebacterium striatum</i>     | 2.12 |                                |
| <i>Corynebacterium striatum</i>         | 9.65 | <i>Corynebacterium striatum</i>     | 2.2  |                                |
| <i>Corynebacterium striatum</i>         | 9.63 | <i>Corynebacterium striatum</i>     | 2.38 |                                |
| <i>Corynebacterium striatum</i>         | 9.71 | <i>Corynebacterium striatum</i>     | 2.31 |                                |
| <i>Corynebacterium striatum</i>         | 9.74 | <i>Corynebacterium striatum</i>     | 2.31 |                                |
| <i>Cutibacterium acnes subsp. acnes</i> | 9.16 | <i>Cutibacterium acnes</i>          | 2.39 |                                |
| <i>Cutibacterium acnes subsp. acnes</i> | 9.06 | <i>Cutibacterium acnes</i>          | 2.17 |                                |
| <i>Dermabacter hominis</i>              | 9.14 | <i>Dermabacter hominis</i>          | 2.08 |                                |
| <i>Dermabacter hominis</i>              | 9.19 | <i>Dermabacter hominis</i>          | 2.13 |                                |
| <i>Dermabacter hominis</i>              | 9.13 | <i>Dermabacter hominis</i>          | 2.15 |                                |
| <i>Eggerthella lenta</i>                | 9.16 | <i>Eggerthella lenta</i>            | 2.18 |                                |
| <i>Enterobacter cloacae</i>             | 9.16 | <i>Enterobacter cloacae</i>         | 2.16 |                                |
| <i>Enterobacter cloacae</i>             | 9.04 | <i>Enterobacter cloacae</i>         | 2.31 |                                |
| <i>Enterobacter cloacae</i>             | 9.21 | <i>Enterobacter hormaechei</i>      | 2.44 | <i>Enterobacter hormaechei</i> |
| <i>Enterobacter cloacae</i>             | 9.01 | <i>Enterobacter cloacae</i>         | 2.5  |                                |
| <i>Enterobacter cloacae</i>             | 9.03 | <i>Enterobacter cloacae</i>         | 2.39 |                                |
| <i>Enterobacter hormaechei</i>          | 9.01 | <i>Enterobacter hormaechei</i>      | 2.45 |                                |
| <i>Enterobacter hormaechei</i>          | 9.08 | <i>Enterobacter hormaechei</i>      | 2.28 |                                |
| <i>Enterobacter hormaechei</i>          | 9.15 | <i>Enterobacter hormaechei</i>      | 2.24 |                                |
| <i>Enterobacter kobei</i>               | 9.17 | <i>Enterobacter kobei</i>           | 2.39 |                                |
| <i>Enterobacter kobei</i>               | 9.29 | <i>Enterobacter kobei</i>           | 2.26 |                                |
| <i>Enterobacter kobei</i>               | 9.09 | <i>Enterobacter kobei</i>           | 2.29 |                                |
| <i>Enterobacter kobei</i>               | 9.03 | <i>Enterobacter kobei</i>           | 2.33 |                                |

|                              |      |                              |      |
|------------------------------|------|------------------------------|------|
| <i>Enterococcus avium</i>    | 9.55 | <i>Enterococcus avium</i>    | 2.01 |
| <i>Enterococcus avium</i>    | 9.57 | <i>Enterococcus avium</i>    | 2.19 |
| <i>Enterococcus faecalis</i> | 9.52 | <i>Enterococcus faecalis</i> | 2.19 |
| <i>Enterococcus faecalis</i> | 9.56 | <i>Enterococcus faecalis</i> | 2.2  |
| <i>Enterococcus faecalis</i> | 9.64 | <i>Enterococcus faecalis</i> | 2.21 |
| <i>Enterococcus faecalis</i> | 9.68 | <i>Enterococcus faecalis</i> | 2.40 |
| <i>Enterococcus faecalis</i> | 9.56 | <i>Enterococcus faecalis</i> | 2.08 |
| <i>Enterococcus faecalis</i> | 9.57 | <i>Enterococcus faecalis</i> | 2.21 |
| <i>Enterococcus faecalis</i> | 9.52 | <i>Enterococcus faecalis</i> | 2.15 |
| <i>Enterococcus faecalis</i> | 9.63 | <i>Enterococcus faecalis</i> | 2.25 |
| <i>Enterococcus faecalis</i> | 9.67 | <i>Enterococcus faecalis</i> | 2.39 |
| <i>Enterococcus faecalis</i> | 9.63 | <i>Enterococcus faecalis</i> | 2.29 |
| <i>Enterococcus faecalis</i> | 9.52 | <i>Enterococcus faecalis</i> | 2.07 |
| <i>Enterococcus faecalis</i> | 9.69 | <i>Enterococcus faecalis</i> | 2.37 |
| <i>Enterococcus faecalis</i> | 9.65 | <i>Enterococcus faecalis</i> | 2.36 |
| <i>Enterococcus faecalis</i> | 9.62 | <i>Enterococcus faecalis</i> | 2.18 |
| <i>Enterococcus faecalis</i> | 9.55 | <i>Enterococcus faecalis</i> | 2.17 |
| <i>Enterococcus faecalis</i> | 9.71 | <i>Enterococcus faecalis</i> | 2.24 |
| <i>Enterococcus faecalis</i> | 9.69 | <i>Enterococcus faecalis</i> | 2.28 |
| <i>Enterococcus faecalis</i> | 9.73 | <i>Enterococcus faecalis</i> | 2.46 |
| <i>Enterococcus faecalis</i> | 9.73 | <i>Enterococcus faecalis</i> | 2.36 |
| <i>Enterococcus faecalis</i> | 9.24 | <i>Enterococcus faecalis</i> | 2.3  |
| <i>Enterococcus faecalis</i> | 9.61 | <i>Enterococcus faecalis</i> | 2.05 |
| <i>Enterococcus faecalis</i> | 9.69 | <i>Enterococcus faecalis</i> | 2.25 |
| <i>Enterococcus faecalis</i> | 9.66 | <i>Enterococcus faecalis</i> | 2.21 |
| <i>Enterococcus faecalis</i> | 9.62 | <i>Enterococcus faecalis</i> | 2.16 |
| <i>Enterococcus faecalis</i> | 9.63 | <i>Enterococcus faecalis</i> | 2.16 |
| <i>Enterococcus faecalis</i> | 9.40 | <i>Enterococcus faecalis</i> | 2.01 |
| <i>Enterococcus faecalis</i> | 9.62 | <i>Enterococcus faecalis</i> | 2.18 |
| <i>Enterococcus faecalis</i> | 9.66 | <i>Enterococcus faecalis</i> | 2.08 |
| <i>Enterococcus faecalis</i> | 9.67 | <i>Enterococcus faecalis</i> | 2.3  |
| <i>Enterococcus faecalis</i> | 9.68 | <i>Enterococcus faecalis</i> | 2.28 |
| <i>Enterococcus faecalis</i> | 9.71 | <i>Enterococcus faecalis</i> | 2.21 |

|                                 |      |                                 |      |
|---------------------------------|------|---------------------------------|------|
| <i>Enterococcus faecium</i>     | 9.67 | <i>Enterococcus faecium</i>     | 2.39 |
| <i>Enterococcus faecium</i>     | 9.63 | <i>Enterococcus faecium</i>     | 2.32 |
| <i>Enterococcus faecium</i>     | 9.56 | <i>Enterococcus faecium</i>     | 2.05 |
| <i>Enterococcus faecium</i>     | 9.64 | <i>Enterococcus faecium</i>     | 2.32 |
| <i>Enterococcus faecium</i>     | 9.67 | <i>Enterococcus faecium</i>     | 2.19 |
| <i>Enterococcus faecium</i>     | 9.43 | <i>Enterococcus faecium</i>     | 2.16 |
| <i>Enterococcus faecium</i>     | 9.6  | <i>Enterococcus faecium</i>     | 2.42 |
| <i>Enterococcus faecium</i>     | 9.64 | <i>Enterococcus faecium</i>     | 2.37 |
| <i>Enterococcus faecium</i>     | 9.6  | <i>Enterococcus faecium</i>     | 2.43 |
| <i>Enterococcus faecium</i>     | 9.3  | <i>Enterococcus faecium</i>     | 2.05 |
| <i>Enterococcus faecium</i>     | 9.6  | <i>Enterococcus faecium</i>     | 2.29 |
| <i>Enterococcus faecium</i>     | 9.52 | <i>Enterococcus faecium</i>     | 2.24 |
| <i>Enterococcus faecium</i>     | 9.59 | <i>Enterococcus faecium</i>     | 2.3  |
| <i>Enterococcus faecium</i>     | 9.67 | <i>Enterococcus faecium</i>     | 2.47 |
| <i>Enterococcus faecium</i>     | 9.66 | <i>Enterococcus faecium</i>     | 2.48 |
| <i>Enterococcus faecium</i>     | 9.56 | <i>Enterococcus faecium</i>     | 2.41 |
| <i>Enterococcus faecium</i>     | 9.67 | <i>Enterococcus faecium</i>     | 2.35 |
| <i>Enterococcus faecium</i>     | 9.67 | <i>Enterococcus faecium</i>     | 2.41 |
| <i>Enterococcus faecium</i>     | 9.62 | <i>Enterococcus faecium</i>     | 2.42 |
| <i>Enterococcus faecium</i>     | 9.67 | <i>Enterococcus faecium</i>     | 2.3  |
| <i>Enterococcus faecium</i>     | 9.49 | <i>Enterococcus faecium</i>     | 2.19 |
| <i>Enterococcus faecium</i>     | 9.54 | <i>Enterococcus faecium</i>     | 2.35 |
| <i>Enterococcus faecium</i>     | 9.77 | <i>Enterococcus faecium</i>     | 2.49 |
| <i>Enterococcus faecium</i>     | 9.67 | <i>Enterococcus faecium</i>     | 2.48 |
| <i>Enterococcus faecium</i>     | 9.59 | <i>Enterococcus faecium</i>     | 2.28 |
| <i>Enterococcus gallinarum</i>  | 9.67 | <i>Enterococcus gallinarum</i>  | 2.37 |
| <i>Enterococcus gallinarum</i>  | 9.57 | <i>Enterococcus gallinarum</i>  | 2.35 |
| <i>Enterococcus gallinarum</i>  | 9.35 | <i>Enterococcus gallinarum</i>  | 2.03 |
| <i>Enterococcus malodoratus</i> | 9.6  | <i>Enterococcus malodoratus</i> | 2.14 |
| <i>Escherichia coli</i>         | 9.62 | <i>Escherichia coli</i>         | 2.28 |
| <i>Escherichia coli</i>         | 9.73 | <i>Escherichia coli</i>         | 2.34 |
| <i>Escherichia coli</i>         | 9.62 | <i>Escherichia coli</i>         | 2.31 |
| <i>Escherichia coli</i>         | 9.56 | <i>Escherichia coli</i>         | 2.21 |

|                         |      |                         |      |
|-------------------------|------|-------------------------|------|
| <i>Escherichia coli</i> | 9.58 | <i>Escherichia coli</i> | 2.14 |
| <i>Escherichia coli</i> | 9.7  | <i>Escherichia coli</i> | 2.35 |
| <i>Escherichia coli</i> | 9.54 | <i>Escherichia coli</i> | 2.28 |
| <i>Escherichia coli</i> | 9.67 | <i>Escherichia coli</i> | 2.28 |
| <i>Escherichia coli</i> | 9.55 | <i>Escherichia coli</i> | 2.06 |
| <i>Escherichia coli</i> | 9.5  | <i>Escherichia coli</i> | 2.38 |
| <i>Escherichia coli</i> | 9.13 | <i>Escherichia coli</i> | 2.2  |
| <i>Escherichia coli</i> | 9.60 | <i>Escherichia coli</i> | 2.21 |
| <i>Escherichia coli</i> | 9.32 | <i>Escherichia coli</i> | 2.32 |
| <i>Escherichia coli</i> | 9.42 | <i>Escherichia coli</i> | 2.09 |
| <i>Escherichia coli</i> | 9.45 | <i>Escherichia coli</i> | 2.09 |
| <i>Escherichia coli</i> | 9.63 | <i>Escherichia coli</i> | 2.19 |
| <i>Escherichia coli</i> | 9.59 | <i>Escherichia coli</i> | 2.3  |
| <i>Escherichia coli</i> | 9.65 | <i>Escherichia coli</i> | 2.16 |
| <i>Escherichia coli</i> | 9.62 | <i>Escherichia coli</i> | 2.18 |
| <i>Escherichia coli</i> | 9.49 | <i>Escherichia coli</i> | 2.27 |
| <i>Escherichia coli</i> | 9.57 | <i>Escherichia coli</i> | 2.09 |
| <i>Escherichia coli</i> | 9.6  | <i>Escherichia coli</i> | 2.41 |
| <i>Escherichia coli</i> | 9.7  | <i>Escherichia coli</i> | 2.34 |
| <i>Escherichia coli</i> | 9.75 | <i>Escherichia coli</i> | 2.4  |
| <i>Escherichia coli</i> | 9.34 | <i>Escherichia coli</i> | 2.3  |
| <i>Escherichia coli</i> | 9.59 | <i>Escherichia coli</i> | 2.19 |
| <i>Escherichia coli</i> | 9.63 | <i>Escherichia coli</i> | 2.04 |
| <i>Escherichia coli</i> | 9.72 | <i>Escherichia coli</i> | 2.4  |
| <i>Escherichia coli</i> | 9.68 | <i>Escherichia coli</i> | 2.4  |
| <i>Escherichia coli</i> | 9.66 | <i>Escherichia coli</i> | 2.2  |
| <i>Escherichia coli</i> | 9.6  | <i>Escherichia coli</i> | 2.36 |
| <i>Escherichia coli</i> | 9.65 | <i>Escherichia coli</i> | 2.05 |
| <i>Escherichia coli</i> | 9.68 | <i>Escherichia coli</i> | 2.09 |
| <i>Escherichia coli</i> | 9.48 | <i>Escherichia coli</i> | 1.83 |
| <i>Escherichia coli</i> | 9.68 | <i>Escherichia coli</i> | 2.32 |
| <i>Escherichia coli</i> | 9.6  | <i>Escherichia coli</i> | 2.05 |
| <i>Escherichia coli</i> | 9.44 | <i>Escherichia coli</i> | 2.0  |

|                                 |      |                                 |      |
|---------------------------------|------|---------------------------------|------|
| <i>Escherichia coli</i>         | 9.67 | <i>Escherichia coli</i>         | 2.26 |
| <i>Escherichia coli</i>         | 9.66 | <i>Escherichia coli</i>         | 2.11 |
| <i>Escherichia coli</i>         | 9.52 | <i>Escherichia coli</i>         | 2.07 |
| <i>Escherichia coli</i>         | 9.5  | <i>Escherichia coli</i>         | 2.04 |
| <i>Haemophilus haemolyticus</i> | 9.43 | <i>Haemophilus haemolyticus</i> | 2.18 |
| <i>Haemophilus haemolyticus</i> | 9.29 | <i>Haemophilus haemolyticus</i> | 2.19 |
| <i>Haemophilus influenzae</i>   | 9.42 | <i>Haemophilus influenzae</i>   | 2.24 |
| <i>Haemophilus influenzae</i>   | 9.04 | <i>Haemophilus influenzae</i>   | 2.12 |
| <i>Haemophilus influenzae</i>   | 9.00 | <i>Haemophilus influenzae</i>   | 2.1  |
| <i>Haemophilus influenzae</i>   | 9.28 | <i>Haemophilus influenzae</i>   | 2.2  |
| <i>Hafnia alvei</i>             | 9.57 | <i>Hafnia alvei</i>             | 2.27 |
| <i>Hafnia alvei</i>             | 9.26 | <i>Hafnia alvei</i>             | 2.11 |
| <i>Klebsiella aerogenes</i>     | 9.55 | <i>Klebsiella aerogenes</i>     | 2.19 |
| <i>Klebsiella aerogenes</i>     | 9.56 | <i>Klebsiella aerogenes</i>     | 2.15 |
| <i>Klebsiella oxytoca</i>       | 9.43 | <i>Klebsiella oxytoca</i>       | 2.1  |
| <i>Klebsiella oxytoca</i>       | 9.48 | <i>Klebsiella oxytoca</i>       | 2.16 |
| <i>Klebsiella oxytoca</i>       | 9.64 | <i>Klebsiella oxytoca</i>       | 2.33 |
| <i>Klebsiella oxytoca</i>       | 9.09 | <i>Klebsiella oxytoca</i>       | 2.28 |
| <i>Klebsiella oxytoca</i>       | 9.5  | <i>Klebsiella oxytoca</i>       | 2.31 |
| <i>Klebsiella oxytoca</i>       | 9.61 | <i>Klebsiella oxytoca</i>       | 2.17 |
| <i>Klebsiella pneumoniae</i>    | 9.03 | <i>Klebsiella pneumoniae</i>    | 2.27 |
| <i>Klebsiella pneumoniae</i>    | 9.12 | <i>Klebsiella pneumoniae</i>    | 2.34 |
| <i>Klebsiella pneumoniae</i>    | 9.25 | <i>Klebsiella pneumoniae</i>    | 2.34 |
| <i>Klebsiella pneumoniae</i>    | 9.53 | <i>Klebsiella pneumoniae</i>    | 2.24 |
| <i>Klebsiella pneumoniae</i>    | 9.73 | <i>Klebsiella pneumoniae</i>    | 2.54 |
| <i>Klebsiella pneumoniae</i>    | 9.51 | <i>Klebsiella pneumoniae</i>    | 2.43 |
| <i>Klebsiella pneumoniae</i>    | 9.03 | <i>Klebsiella pneumoniae</i>    | 2.3  |
| <i>Klebsiella pneumoniae</i>    | 9.23 | <i>Klebsiella pneumoniae</i>    | 2.07 |
| <i>Klebsiella pneumoniae</i>    | 9.11 | <i>Klebsiella pneumoniae</i>    | 2.45 |
| <i>Klebsiella pneumoniae</i>    | 9.05 | <i>Klebsiella pneumoniae</i>    | 2.31 |
| <i>Klebsiella pneumoniae</i>    | 9.16 | <i>Klebsiella pneumoniae</i>    | 2.4  |
| <i>Klebsiella pneumoniae</i>    | 9.05 | <i>Klebsiella pneumoniae</i>    | 2.41 |
| <i>Klebsiella pneumoniae</i>    | 9.13 | <i>Klebsiella pneumoniae</i>    | 2.37 |

|                                                |      |                                     |      |                              |
|------------------------------------------------|------|-------------------------------------|------|------------------------------|
| <i>Klebsiella pneumoniae</i>                   | 9.22 | <i>Klebsiella pneumoniae</i>        | 2.21 |                              |
| <i>Klebsiella pneumoniae</i>                   | 9.2  | <i>Klebsiella pneumoniae</i>        | 2.29 |                              |
| <i>Klebsiella pneumoniae</i>                   | 9.01 | <i>Klebsiella pneumoniae</i>        | 2.43 |                              |
| <i>Klebsiella pneumoniae</i>                   | 9.16 | <i>Klebsiella pneumoniae</i>        | 2.07 |                              |
| <i>Klebsiella pneumoniae</i>                   | 9.12 | <i>Klebsiella pneumoniae</i>        | 2.48 |                              |
| <i>Klebsiella pneumoniae</i>                   | 9.02 | <i>Klebsiella pneumoniae</i>        | 2.34 |                              |
| <i>Klebsiella pneumoniae</i>                   | 9.03 | <i>Klebsiella pneumoniae</i>        | 2.41 |                              |
| <i>Klebsiella pneumoniae</i>                   | 9.2  | <i>Klebsiella variicola</i>         | 2.11 | <i>Klebsiella pneumoniae</i> |
| <i>Klebsiella pneumoniae</i>                   | 9.18 | <i>Klebsiella pneumoniae</i>        | 2.01 |                              |
| <i>Klebsiella pneumoniae</i>                   | 9.17 | <i>Klebsiella pneumoniae</i>        | 2.25 |                              |
| <i>Klebsiella pneumoniae</i>                   | 9.32 | <i>Klebsiella pneumoniae</i>        | 2.34 |                              |
| <i>Klebsiella pneumoniae</i>                   | 9.68 | <i>Klebsiella pneumoniae</i>        | 2.28 |                              |
| <i>Klebsiella pneumoniae</i>                   | 9.17 | <i>Klebsiella pneumoniae</i>        | 2.33 |                              |
| <i>Klebsiella pneumoniae</i>                   | 9.72 | <i>Klebsiella pneumoniae</i>        | 2.41 |                              |
| <i>Klebsiella pneumoniae</i>                   | 9.67 | <i>Klebsiella pneumoniae</i>        | 2.51 |                              |
| <i>Klebsiella pneumoniae</i>                   | 9.20 | <i>Klebsiella pneumoniae</i>        | 2.16 |                              |
| <i>Klebsiella pneumoniae</i>                   | 9.15 | <i>Klebsiella pneumoniae</i>        | 2.45 |                              |
| <i>Klebsiella pneumoniae</i>                   | 9.28 | <i>Klebsiella pneumoniae</i>        | 2.48 |                              |
| <i>Klebsiella pneumoniae subsp. pneumoniae</i> | 9.06 | <i>Klebsiella pneumoniae</i>        | 2.49 |                              |
| <i>Klebsiella pneumoniae subsp. pneumoniae</i> | 9.13 | <i>Klebsiella pneumoniae</i>        | 2.37 |                              |
| <i>Klebsiella pneumoniae subsp. ozaenae</i>    | 9.02 | <i>Klebsiella pneumoniae</i>        | 2.2  |                              |
| <i>Klebsiella pneumoniae subsp. ozaenae</i>    | 9.02 | <i>Klebsiella pneumoniae</i>        | 2.14 |                              |
| <i>Klebsiella variicola</i>                    | 9.07 | <i>Klebsiella variicola</i>         | 2.32 |                              |
| <i>Lactacaseibacillus rhamnosus</i>            | 9.62 | <i>Lactacaseibacillus rhamnosus</i> | 2.34 |                              |
| <i>Lactobacillus delbrueckii</i>               | 9.01 | <i>Lactobacillus delbrueckii</i>    | 2.25 |                              |
| <i>Lactobacillus delbrueckii</i>               | 9.05 | <i>Lactobacillus delbrueckii</i>    | 2.08 |                              |
| <i>Lactobacillus gasseri</i>                   | 9.53 | <i>Lactobacillus gasseri</i>        | 2.25 |                              |
| <i>Lactobacillus rhamnosus</i>                 | 9.19 | <i>Lactobacillus rhamnosus</i>      | 2.08 |                              |
| <i>Lactobacillus rhamnosus</i>                 | 9.6  | <i>Lactobacillus rhamnosus</i>      | 2.35 |                              |
| <i>Lactobacillus rhamnosus</i>                 | 9.5  | <i>Lactobacillus rhamnosus</i>      | 2.15 |                              |
| <i>Lactobacillus rhamnosus</i>                 | 9.49 | <i>Lactacaseibacillus rhamnosus</i> | 2.22 |                              |
| <i>Morganella morganii</i>                     | 9.64 | <i>Morganella morganii</i>          | 2.12 |                              |
| <i>Morganella morganii</i>                     | 9.63 | <i>Morganella morganii</i>          | 2.27 |                              |

|                                      |      |                                      |      |
|--------------------------------------|------|--------------------------------------|------|
| <i>Morganella morganii</i>           | 9.6  | <i>Morganella morganii</i>           | 2.1  |
| <i>Morganella morganii</i>           | 9.73 | <i>Morganella morganii</i>           | 2.43 |
| <i>Morganella morganii</i>           | 9.75 | <i>Morganella morganii</i>           | 2.43 |
| <i>Morganella morganii</i>           | 9.77 | <i>Morganella morganii</i>           | 2.57 |
| <i>Morganella morganii</i>           | 9.69 | <i>Morganella morganii</i>           | 2.39 |
| <i>Morganella morganii</i>           | 9.75 | <i>Morganella morganii</i>           | 2.41 |
| <i>Morganella morganii</i>           | 9.75 | <i>Morganella morganii</i>           | 2.55 |
| <i>Pantoea ananatis</i>              | 9.51 | <i>Pantoea ananatis</i>              | 2.15 |
| <i>Parvimonas micra</i>              | 9.11 | <i>Parvimonas micra</i>              | 2.3  |
| <i>Peptostreptococcus anaerobius</i> | 9.53 | <i>Peptostreptococcus anaerobius</i> | 2.19 |
| <i>Prevotella bivia</i>              | 9.58 | <i>Prevotella bivia</i>              | 2.09 |
| <i>Prevotella bivia</i>              | 9.52 | <i>Prevotella bivia</i>              | 2.14 |
| <i>Proteus mirabilis</i>             | 9.68 | <i>Proteus mirabilis</i>             | 2.42 |
| <i>Proteus mirabilis</i>             | 9.65 | <i>Proteus mirabilis</i>             | 2.38 |
| <i>Proteus mirabilis</i>             | 9.75 | <i>Proteus mirabilis</i>             | 2.39 |
| <i>Proteus mirabilis</i>             | 9.63 | <i>Proteus mirabilis</i>             | 2.22 |
| <i>Proteus mirabilis</i>             | 9.63 | <i>Proteus mirabilis</i>             | 2.4  |
| <i>Proteus mirabilis</i>             | 9.24 | <i>Proteus mirabilis</i>             | 2.5  |
| <i>Proteus mirabilis</i>             | 9.6  | <i>Proteus mirabilis</i>             | 2.14 |
| <i>Proteus mirabilis</i>             | 9.67 | <i>Proteus mirabilis</i>             | 2.24 |
| <i>Proteus mirabilis</i>             | 9.65 | <i>Proteus mirabilis</i>             | 2.4  |
| <i>Proteus mirabilis</i>             | 9.7  | <i>Proteus mirabilis</i>             | 2.35 |
| <i>Proteus mirabilis</i>             | 9.71 | <i>Proteus mirabilis</i>             | 2.36 |
| <i>Proteus mirabilis</i>             | 9.02 | <i>Proteus mirabilis</i>             | 2.46 |
| <i>Proteus mirabilis</i>             | 9.67 | <i>Proteus mirabilis</i>             | 2.46 |
| <i>Proteus mirabilis</i>             | 9.66 | <i>Proteus mirabilis</i>             | 2.29 |
| <i>Proteus mirabilis</i>             | 9.55 | <i>Proteus mirabilis</i>             | 2.19 |
| <i>Proteus mirabilis</i>             | 9.63 | <i>Proteus mirabilis</i>             | 2.29 |
| <i>Proteus mirabilis</i>             | 9.73 | <i>Proteus mirabilis</i>             | 2.42 |
| <i>Proteus mirabilis</i>             | 9.69 | <i>Proteus mirabilis</i>             | 2.44 |
| <i>Proteus mirabilis</i>             | 9.73 | <i>Proteus mirabilis</i>             | 2.54 |
| <i>Proteus mirabilis</i>             | 9.72 | <i>Proteus mirabilis</i>             | 2.46 |
| <i>Proteus mirabilis</i>             | 9.62 | <i>Proteus mirabilis</i>             | 2.31 |



|                               |      |                               |      |
|-------------------------------|------|-------------------------------|------|
| <i>Proteus mirabilis</i>      | 9.7  | <i>Proteus mirabilis</i>      | 2.51 |
| <i>Proteus mirabilis</i>      | 9.67 | <i>Proteus mirabilis</i>      | 2.29 |
| <i>Proteus mirabilis</i>      | 9.69 | <i>Proteus mirabilis</i>      | 2.39 |
| <i>Proteus mirabilis</i>      | 9.69 | <i>Proteus mirabilis</i>      | 2.39 |
| <i>Providencia rettgeri</i>   | 9.45 | <i>Providencia rettgeri</i>   | 2.05 |
| <i>Providencia stuartii</i>   | 9.57 | <i>Providencia stuartii</i>   | 2.43 |
| <i>Providencia stuartii</i>   | 9.60 | <i>Providencia stuartii</i>   | 2.35 |
| <i>Providencia stuartii</i>   | 9.65 | <i>Providencia stuartii</i>   | 2.47 |
| <i>Pseudomonas aeruginosa</i> | 9.68 | <i>Pseudomonas aeruginosa</i> | 2.34 |
| <i>Pseudomonas aeruginosa</i> | 9.66 | <i>Pseudomonas aeruginosa</i> | 2.37 |
| <i>Pseudomonas aeruginosa</i> | 9.63 | <i>Pseudomonas aeruginosa</i> | 2.33 |
| <i>Pseudomonas aeruginosa</i> | 9.51 | <i>Pseudomonas aeruginosa</i> | 2.23 |
| <i>Pseudomonas aeruginosa</i> | 9.6  | <i>Pseudomonas aeruginosa</i> | 2.33 |
| <i>Pseudomonas aeruginosa</i> | 9.68 | <i>Pseudomonas aeruginosa</i> | 2.19 |
| <i>Pseudomonas aeruginosa</i> | 9.66 | <i>Pseudomonas aeruginosa</i> | 2.36 |
| <i>Pseudomonas aeruginosa</i> | 9.65 | <i>Pseudomonas aeruginosa</i> | 2.03 |
| <i>Pseudomonas aeruginosa</i> | 9.41 | <i>Pseudomonas aeruginosa</i> | 2.2  |
| <i>Pseudomonas aeruginosa</i> | 9.51 | <i>Pseudomonas aeruginosa</i> | 2.21 |
| <i>Pseudomonas aeruginosa</i> | 9.55 | <i>Pseudomonas aeruginosa</i> | 2.31 |
| <i>Pseudomonas aeruginosa</i> | 9.67 | <i>Pseudomonas aeruginosa</i> | 2.27 |
| <i>Pseudomonas aeruginosa</i> | 9.52 | <i>Pseudomonas aeruginosa</i> | 2.22 |
| <i>Pseudomonas aeruginosa</i> | 9.57 | <i>Pseudomonas aeruginosa</i> | 2.31 |
| <i>Pseudomonas aeruginosa</i> | 9.52 | <i>Pseudomonas aeruginosa</i> | 2.14 |
| <i>Pseudomonas aeruginosa</i> | 9.6  | <i>Pseudomonas aeruginosa</i> | 2.37 |
| <i>Pseudomonas aeruginosa</i> | 9.68 | <i>Pseudomonas aeruginosa</i> | 2.49 |
| <i>Pseudomonas aeruginosa</i> | 9.5  | <i>Pseudomonas aeruginosa</i> | 2.29 |
| <i>Pseudomonas aeruginosa</i> | 9.64 | <i>Pseudomonas aeruginosa</i> | 2.26 |
| <i>Pseudomonas aeruginosa</i> | 9.58 | <i>Pseudomonas aeruginosa</i> | 2.3  |
| <i>Pseudomonas aeruginosa</i> | 9.46 | <i>Pseudomonas aeruginosa</i> | 2.16 |
| <i>Pseudomonas aeruginosa</i> | 9.56 | <i>Pseudomonas aeruginosa</i> | 2.27 |
| <i>Pseudomonas aeruginosa</i> | 9.53 | <i>Pseudomonas aeruginosa</i> | 2.1  |
| <i>Pseudomonas aeruginosa</i> | 9.7  | <i>Pseudomonas aeruginosa</i> | 2.35 |
| <i>Pseudomonas aeruginosa</i> | 9.65 | <i>Pseudomonas aeruginosa</i> | 2.43 |

|                               |      |                               |      |
|-------------------------------|------|-------------------------------|------|
| <i>Pseudomonas aeruginosa</i> | 9.64 | <i>Pseudomonas aeruginosa</i> | 2.31 |
| <i>Pseudomonas aeruginosa</i> | 9.54 | <i>Pseudomonas aeruginosa</i> | 2.09 |
| <i>Pseudomonas aeruginosa</i> | 9.67 | <i>Pseudomonas aeruginosa</i> | 2.32 |
| <i>Pseudomonas aeruginosa</i> | 9.60 | <i>Pseudomonas aeruginosa</i> | 2.35 |
| <i>Pseudomonas aeruginosa</i> | 9.66 | <i>Pseudomonas aeruginosa</i> | 2.36 |
| <i>Serratia marcescens</i>    | 9.68 | <i>Serratia marcescens</i>    | 2.26 |
| <i>Serratia marcescens</i>    | 9.54 | <i>Serratia marcescens</i>    | 2.13 |
| <i>Staphylococcus aureus</i>  | 9.6  | <i>Staphylococcus aureus</i>  | 2.27 |
| <i>Staphylococcus aureus</i>  | 9.53 | <i>Staphylococcus aureus</i>  | 2.33 |
| <i>Staphylococcus aureus</i>  | 9.62 | <i>Staphylococcus aureus</i>  | 2.43 |
| <i>Staphylococcus aureus</i>  | 9.61 | <i>Staphylococcus aureus</i>  | 2.34 |
| <i>Staphylococcus aureus</i>  | 9.6  | <i>Staphylococcus aureus</i>  | 2.11 |
| <i>Staphylococcus aureus</i>  | 9.14 | <i>Staphylococcus aureus</i>  | 2.09 |
| <i>Staphylococcus aureus</i>  | 9.56 | <i>Staphylococcus aureus</i>  | 2.23 |
| <i>Staphylococcus aureus</i>  | 9.29 | <i>Staphylococcus aureus</i>  | 2.04 |
| <i>Staphylococcus aureus</i>  | 9.01 | <i>Staphylococcus aureus</i>  | 2.03 |
| <i>Staphylococcus aureus</i>  | 9.52 | <i>Staphylococcus aureus</i>  | 2.12 |
| <i>Staphylococcus aureus</i>  | 9.63 | <i>Staphylococcus aureus</i>  | 2.38 |
| <i>Staphylococcus aureus</i>  | 9.57 | <i>Staphylococcus aureus</i>  | 2.23 |
| <i>Staphylococcus aureus</i>  | 9.47 | <i>Staphylococcus aureus</i>  | 2.34 |
| <i>Staphylococcus aureus</i>  | 9.08 | <i>Staphylococcus aureus</i>  | 2.04 |
| <i>Staphylococcus aureus</i>  | 9.52 | <i>Staphylococcus aureus</i>  | 2.23 |
| <i>Staphylococcus aureus</i>  | 9.01 | <i>Staphylococcus aureus</i>  | 2.15 |
| <i>Staphylococcus aureus</i>  | 9.55 | <i>Staphylococcus aureus</i>  | 2.32 |
| <i>Staphylococcus aureus</i>  | 9.06 | <i>Staphylococcus aureus</i>  | 2.09 |
| <i>Staphylococcus aureus</i>  | 9.42 | <i>Staphylococcus aureus</i>  | 2.24 |
| <i>Staphylococcus aureus</i>  | 9.63 | <i>Staphylococcus aureus</i>  | 2.4  |
| <i>Staphylococcus aureus</i>  | 9.55 | <i>Staphylococcus aureus</i>  | 2.34 |
| <i>Staphylococcus aureus</i>  | 9.66 | <i>Staphylococcus aureus</i>  | 2.41 |
| <i>Staphylococcus aureus</i>  | 9.41 | <i>Staphylococcus aureus</i>  | 2.3  |
| <i>Staphylococcus aureus</i>  | 9.26 | <i>Staphylococcus aureus</i>  | 2.24 |
| <i>Staphylococcus aureus</i>  | 9.37 | <i>Staphylococcus aureus</i>  | 2.03 |
| <i>Staphylococcus aureus</i>  | 9.03 | <i>Staphylococcus aureus</i>  | 2.07 |

|                                   |      |                                   |      |
|-----------------------------------|------|-----------------------------------|------|
| <i>Staphylococcus aureus</i>      | 9.62 | <i>Staphylococcus aureus</i>      | 2.29 |
| <i>Staphylococcus aureus</i>      | 9.63 | <i>Staphylococcus aureus</i>      | 2.33 |
| <i>Staphylococcus aureus</i>      | 9.48 | <i>Staphylococcus aureus</i>      | 2.22 |
| <i>Staphylococcus aureus</i>      | 9.28 | <i>Staphylococcus aureus</i>      | 2.28 |
| <i>Staphylococcus aureus</i>      | 9.68 | <i>Staphylococcus aureus</i>      | 2.46 |
| <i>Staphylococcus aureus</i>      | 9.63 | <i>Staphylococcus aureus</i>      | 2.41 |
| <i>Staphylococcus aureus</i>      | 9.68 | <i>Staphylococcus aureus</i>      | 2.44 |
| <i>Staphylococcus aureus</i>      | 9.08 | <i>Staphylococcus aureus</i>      | 2.11 |
| <i>Staphylococcus capitis</i>     | 9.47 | <i>Staphylococcus capitis</i>     | 2.14 |
| <i>Staphylococcus capitis</i>     | 9.19 | <i>Staphylococcus capitis</i>     | 2.05 |
| <i>Staphylococcus capitis</i>     | 9.35 | <i>Staphylococcus capitis</i>     | 2.12 |
| <i>Staphylococcus capitis</i>     | 9.29 | <i>Staphylococcus capitis</i>     | 2.11 |
| <i>Staphylococcus capitis</i>     | 9.18 | <i>Staphylococcus capitis</i>     | 2.04 |
| <i>Staphylococcus capitis</i>     | 9.22 | <i>Staphylococcus capitis</i>     | 2.12 |
| <i>Staphylococcus caprae</i>      | 9.28 | <i>Staphylococcus caprae</i>      | 2.03 |
| <i>Staphylococcus epidermidis</i> | 9.24 | <i>Staphylococcus epidermidis</i> | 2.09 |
| <i>Staphylococcus epidermidis</i> | 9.23 | <i>Staphylococcus epidermidis</i> | 2.0  |
| <i>Staphylococcus epidermidis</i> | 9.14 | <i>Staphylococcus epidermidis</i> | 2.13 |
| <i>Staphylococcus epidermidis</i> | 9.26 | <i>Staphylococcus epidermidis</i> | 2.07 |
| <i>Staphylococcus epidermidis</i> | 9.35 | <i>Staphylococcus epidermidis</i> | 2.03 |
| <i>Staphylococcus epidermidis</i> | 9.31 | <i>Staphylococcus epidermidis</i> | 2.16 |
| <i>Staphylococcus epidermidis</i> | 9.31 | <i>Staphylococcus epidermidis</i> | 2.22 |
| <i>Staphylococcus epidermidis</i> | 9.50 | <i>Staphylococcus epidermidis</i> | 2.16 |
| <i>Staphylococcus epidermidis</i> | 9.47 | <i>Staphylococcus epidermidis</i> | 2.06 |
| <i>Staphylococcus epidermidis</i> | 9.14 | <i>Staphylococcus epidermidis</i> | 2.1  |
| <i>Staphylococcus epidermidis</i> | 9.09 | <i>Staphylococcus epidermidis</i> | 2.0  |
| <i>Staphylococcus epidermidis</i> | 9.57 | <i>Staphylococcus epidermidis</i> | 2.12 |
| <i>Staphylococcus epidermidis</i> | 9.29 | <i>Staphylococcus epidermidis</i> | 2.02 |
| <i>Staphylococcus epidermidis</i> | 9.45 | <i>Staphylococcus epidermidis</i> | 2.07 |
| <i>Staphylococcus epidermidis</i> | 9.23 | <i>Staphylococcus epidermidis</i> | 2.02 |
| <i>Staphylococcus epidermidis</i> | 9.32 | <i>Staphylococcus epidermidis</i> | 2.16 |
| <i>Staphylococcus epidermidis</i> | 9.26 | <i>Staphylococcus epidermidis</i> | 2.01 |
| <i>Staphylococcus epidermidis</i> | 9.48 | <i>Staphylococcus epidermidis</i> | 2.02 |

|                                        |      |                                        |      |
|----------------------------------------|------|----------------------------------------|------|
| <i>Staphylococcus epidermidis</i>      | 9.26 | <i>Staphylococcus epidermidis</i>      | 2.1  |
| <i>Staphylococcus epidermidis</i>      | 9.27 | <i>Staphylococcus epidermidis</i>      | 2.02 |
| <i>Staphylococcus epidermidis</i>      | 9.35 | <i>Staphylococcus epidermidis</i>      | 2.24 |
| <i>Staphylococcus epidermidis</i>      | 9.26 | <i>Staphylococcus epidermidis</i>      | 2.02 |
| <i>Staphylococcus epidermidis</i>      | 9.44 | <i>Staphylococcus epidermidis</i>      | 2.08 |
| <i>Staphylococcus epidermidis</i>      | 9.42 | <i>Staphylococcus epidermidis</i>      | 2.03 |
| <i>Staphylococcus haemolyticus</i>     | 9.05 | <i>Staphylococcus haemolyticus</i>     | 2.06 |
| <i>Staphylococcus haemolyticus</i>     | 9.61 | <i>Staphylococcus haemolyticus</i>     | 2.08 |
| <i>Staphylococcus haemolyticus</i>     | 9.53 | <i>Staphylococcus haemolyticus</i>     | 2.09 |
| <i>Staphylococcus haemolyticus</i>     | 9.36 | <i>Staphylococcus haemolyticus</i>     | 2.05 |
| <i>Staphylococcus haemolyticus</i>     | 9.06 | <i>Staphylococcus haemolyticus</i>     | 2.04 |
| <i>Staphylococcus haemolyticus</i>     | 9.59 | <i>Staphylococcus haemolyticus</i>     | 2.10 |
| <i>Staphylococcus haemolyticus</i>     | 9.00 | <i>Staphylococcus haemolyticus</i>     | 2.05 |
| <i>Staphylococcus hominis</i>          | 9.52 | <i>Staphylococcus hominis</i>          | 2.12 |
| <i>Staphylococcus hominis</i>          | 9.15 | <i>Staphylococcus hominis</i>          | 2.01 |
| <i>Staphylococcus lugdunensis</i>      | 9.27 | <i>Staphylococcus lugdunensis</i>      | 2.09 |
| <i>Staphylococcus lugdunensis</i>      | 9.58 | <i>Staphylococcus lugdunensis</i>      | 2.2  |
| <i>Staphylococcus pasteurii</i>        | 9.58 | <i>Staphylococcus pasteurii</i>        | 2.19 |
| <i>Staphylococcus pseudintermedius</i> | 9.51 | <i>Staphylococcus pseudintermedius</i> | 2.02 |
| <i>Stenotrophomonas maltophilia</i>    | 9.28 | <i>Stenotrophomonas maltophilia</i>    | 2.44 |
| <i>Stenotrophomonas maltophilia</i>    | 9.45 | <i>Stenotrophomonas maltophilia</i>    | 2.07 |
| <i>Streptococcus agalactiae</i>        | 9.60 | <i>Streptococcus agalactiae</i>        | 2.3  |
| <i>Streptococcus agalactiae</i>        | 9.59 | <i>Streptococcus agalactiae</i>        | 2.18 |
| <i>Streptococcus agalactiae</i>        | 9.6  | <i>Streptococcus agalactiae</i>        | 2.31 |
| <i>Streptococcus agalactiae</i>        | 9.64 | <i>Streptococcus agalactiae</i>        | 2.22 |
| <i>Streptococcus agalactiae</i>        | 9.73 | <i>Streptococcus agalactiae</i>        | 2.31 |
| <i>Streptococcus agalactiae</i>        | 9.73 | <i>Streptococcus agalactiae</i>        | 2.4  |
| <i>Streptococcus agalactiae</i>        | 9.6  | <i>Streptococcus agalactiae</i>        | 2.15 |
| <i>Streptococcus agalactiae</i>        | 9.51 | <i>Streptococcus agalactiae</i>        | 2.21 |
| <i>Streptococcus agalactiae</i>        | 9.47 | <i>Streptococcus agalactiae</i>        | 2.16 |
| <i>Streptococcus anginosus</i>         | 9.4  | <i>Streptococcus anginosus</i>         | 2.13 |
| <i>Streptococcus anginosus</i>         | 9.37 | <i>Streptococcus anginosus</i>         | 2.11 |
| <i>Streptococcus anginosus</i>         | 9.52 | <i>Streptococcus anginosus</i>         | 2.23 |

|                                       |      |                                       |      |                               |
|---------------------------------------|------|---------------------------------------|------|-------------------------------|
| <i>Streptococcus anginosus</i>        | 9.52 | <i>Streptococcus anginosus</i>        | 2.08 |                               |
| <i>Streptococcus anginosus</i>        | 9.56 | <i>Streptococcus anginosus</i>        | 2.01 |                               |
| <i>Streptococcus anginosus</i>        | 9.51 | <i>Streptococcus anginosus</i>        | 2.11 |                               |
| <i>Streptococcus anginosus</i>        | 9.55 | <i>Streptococcus anginosus</i>        | 2.06 |                               |
| <i>Streptococcus constellatus</i>     | 9.55 | <i>Streptococcus constellatus</i>     | 2.09 |                               |
| <i>Streptococcus dysgalactiae</i>     | 9.12 | <i>Streptococcus dysgalactiae</i>     | 2.23 |                               |
| <i>Streptococcus dysgalactiae</i>     | 9.28 | <i>Streptococcus dysgalactiae</i>     | 2.1  |                               |
| <i>Streptococcus gallolyticus</i>     | 9.66 | <i>Streptococcus gallolyticus</i>     | 2.25 |                               |
| <i>Streptococcus gallolyticus</i>     | 9.46 | <i>Streptococcus gallolyticus</i>     | 2.12 |                               |
| <i>Streptococcus gallolyticus</i>     | 9.67 | <i>Streptococcus gallolyticus</i>     | 2.21 |                               |
| <i>Streptococcus gallolyticus</i>     | 9.72 | <i>Streptococcus gallolyticus</i>     | 2.3  |                               |
| <i>Streptococcus gallolyticus</i>     | 9.69 | <i>Streptococcus gallolyticus</i>     | 2.26 |                               |
| <i>Streptococcus gallolyticus</i>     | 9.05 | <i>Streptococcus gallolyticus</i>     | 2.27 |                               |
| <i>Streptococcus gallolyticus</i>     | 9.2  | <i>Streptococcus gallolyticus</i>     | 2.22 |                               |
| <i>Streptococcus gordonii</i>         | 9.27 | <i>Streptococcus gordonii</i>         | 2.22 |                               |
| <i>Streptococcus infantis</i>         | 9.36 | <i>Streptococcus infantis</i>         | 1.78 | <i>Streptococcus infantis</i> |
| <i>Streptococcus intermedius</i>      | 9.32 | <i>Streptococcus intermedius</i>      | 2.36 |                               |
| <i>Streptococcus mitis</i>            | 9.22 | <i>Streptococcus mitis_oralis</i>     | 2.39 | <i>Streptococcus mitis</i>    |
| <i>Streptococcus mitis</i>            | 9.01 | <i>Streptococcus mitis_oralis</i>     | 2.18 | <i>Streptococcus mitis</i>    |
| <i>Streptococcus mitis</i>            | 9.07 | <i>Streptococcus mitis_oralis</i>     | 2.19 | <i>Streptococcus mitis</i>    |
| <i>Streptococcus oralis</i>           | 9.15 | <i>Streptococcus mitis_oralis</i>     | 2.2  | <i>Streptococcus infantis</i> |
| <i>Streptococcus oralis</i>           | 9.08 | <i>Streptococcus mitis_oralis</i>     | 2.18 | <i>Streptococcus oralis</i>   |
| <i>Streptococcus oralis</i>           | 7.23 | <i>Streptococcus infantis</i>         | 1.76 | <i>Streptococcus infantis</i> |
| <i>Streptococcus oralis</i>           | 9.12 | <i>Streptococcus mitis_oralis</i>     | 2.22 | <i>Streptococcus oralis</i>   |
| <i>Streptococcus oralis</i>           | 9.09 | <i>Streptococcus mitis_oralis</i>     | 1.94 | <i>Streptococcus oralis</i>   |
| <i>Streptococcus parasanguinis</i>    | 9.03 | <i>Streptococcus parasanguinis</i>    | 2.01 |                               |
| <i>Streptococcus pneumoniae</i>       | 9.07 | <i>Streptococcus pneumoniae</i>       | 2.19 |                               |
| <i>Streptococcus pneumoniae</i>       | 9.34 | <i>Streptococcus pneumoniae</i>       | 2.34 |                               |
| <i>Streptococcus pneumoniae</i>       | 9.3  | <i>Streptococcus pneumoniae</i>       | 2.39 |                               |
| <i>Streptococcus pseudopneumoniae</i> | 9.01 | <i>Streptococcus pseudopneumoniae</i> | 2.27 |                               |
| <i>Streptococcus pyogenes</i>         | 9.14 | <i>Streptococcus dysgalactiae</i>     | 2.17 |                               |
| <i>Streptococcus pyogenes</i>         | 9.68 | <i>Streptococcus pyogenes</i>         | 2.31 |                               |
| <i>Streptococcus pyogenes</i>         | 9.28 | <i>Streptococcus pyogenes</i>         | 2.12 |                               |

|                                 |      |                                 |      |
|---------------------------------|------|---------------------------------|------|
| <i>Streptococcus pyogenes</i>   | 9.66 | <i>Streptococcus pyogenes</i>   | 2.34 |
| <i>Streptococcus pyogenes</i>   | 9.72 | <i>Streptococcus pyogenes</i>   | 2.26 |
| <i>Streptococcus pyogenes</i>   | 9.79 | <i>Streptococcus pyogenes</i>   | 2.25 |
| <i>Streptococcus salivarius</i> | 9.63 | <i>Streptococcus salivarius</i> | 2.16 |
| <i>Veillonella atypica</i>      | 9.33 | <i>Veillonella atypica</i>      | 2.07 |
| <i>Yersinia enterocolitica</i>  | 9.5  | <i>Yersinia enterocolitica</i>  | 2.33 |
